# GapMind: Automated annotation of amino acid biosynthesis

by Morgan Price, Adam M. Deutschbauer, and Adam P. Arkin, Lawrence Berkeley Lab

## Abstract

GapMind is a web-based tool for annotating amino acid biosynthesis in bacteria and archaea (<http://papers.genomics.lbl.gov/gaps>). GapMind incorporates many variant pathways and 130 different reactions, and it analyzes a genome in just 15 seconds. To avoid error-prone "transitive" annotations, GapMind relies primarily on a database of experimentally-characterized proteins. GapMind correctly handles fusion proteins and split proteins, which often cause errors for "best hit" approaches. To improve GapMind's coverage, we examined genetic data from 35 bacteria that grow in minimal media and we filled many gaps in amino acid biosynthesis pathways. For example, we identified additional genes for arginine synthesis with succinylated intermediates in *Bacteroides thetaiotaomicron* and we propose that *Dyella japonica* synthesizes tyrosine from phenylalanine. Nevertheless, for many bacteria and archaea that grow in minimal media, genes for some steps still cannot be identified. If a potential gap in the genome of interest is also a gap in a related microbe that can grow in minimal media, GapMind marks the gap as "known."

## Introduction

Genome sequences are available for tens of thousands of microbes. For most of these microbes, little is known about their physiology other than the condition that they were isolated under. If the microbe was isolated using a complex substrate such as yeast extract, then nothing is known about its nutritional requirements. To understand the ecological roles or the potential uses of these microbes, it is important to understand their growth requirements, which, in principle, could be predicted from their genome sequences. Specifically, we will focus on whether a microbe can synthesize the 20 standard amino acids.

Although some genomics tools try to predict which amino acids a microbe can synthesize (Chen et al. 2013; D'Souza et al. 2014), the predictions are not at all reliable (Price, Zane, et al. 2018). For instance, when we tested the IMG web site's tool (Chen et al. 2013) with bacteria that can grow in defined media, we found that on average, these bacteria were predicted to be auxotrophic for six amino acids, even though they can make all of them (Price, Zane, et al. 2018).

Predicting growth requirements automatically is challenging for several reasons. First, many bacteria do not use the "standard" biosynthetic pathways from *Escherichia coli* or *Bacillus subtilis* that are described in textbooks. These variant pathways are often missing from the

databases that automated tools rely on (de Crécy-Lagard 2014; Price, Zane, et al. 2018). Variant pathways and variant enzymes continue to be discovered, so accurate prediction of microbial growth capabilities from genome sequences alone may not yet be possible (Price, Zane, et al. 2018).

Second, predicting enzymatic activity from a protein's sequence is challenging if the sequence is very different from any protein that has been studied experimentally. To increase their coverage, comparative tools often rely on databases of annotated proteins, including annotations for proteins that have not been studied experimentally. Unfortunately, many of the enzyme annotations in databases such as Genbank, KEGG or SEED are incorrect (Schnoes et al. 2009; Price, Wetmore, et al. 2018). Another problem is that comparative tools often rely on identifying "best hits," which does not work well for fusion proteins or split proteins. For instance, if a protein is a fusion of X and Y, and its best hit is X, then it might be annotated as X, and Y might appear to be absent.

We built a tool, GapMind, to reconstruct and annotate amino acid biosynthesis pathways in prokaryotic genomes. Given our limited understanding of biosynthetic pathways and the challenges of automated annotation, GapMind does not predict whether a biosynthetic capability is present or not. Instead, it identifies the most plausible pathway for making each amino acid based on current knowledge, and it highlights potential gaps. For instance, if a diverged candidate for a step is identified, then it is labeled as "medium confidence," and if this step is part of the most likely pathway, then it will be highlighted. The user can examine the results and decide if the pathway is likely to be present or not.

To try to ensure that GapMind's results can be traced to experimental data on the function of similar proteins, GapMind relies primarily on similarity to experimentally-characterized proteins. GapMind does not use best hits and it handles fusion proteins and split proteins correctly. GapMind has a web-based interface (<http://papers.genomics.lbl.gov/gaps>) and takes about 15 seconds per genome to run.

GapMind's database includes dozens of variant biosynthetic pathways and enzymes. To identify additional variants, we tested GapMind on 35 bacteria that grow in defined media and for which large-scale genetic data is available. Based on the genetic data, we incorporated two variant pathways and dozens of diverged enzymes into GapMind's database.

Nevertheless, many variant pathways and enzymes remain to be discovered. So GapMind also includes a database of "known gaps" – steps that appear to be missing, yet the organism does grow in minimal media. If a genome of interest appears to lack a step that is a known gap in a similar organism (that can grow in minimal media), then GapMind marks the step as a "known gap." This way, the user can see that the gap may be due to an as-yet unknown enzyme or pathway.

## Results

### How GapMind works

*The amino acid biosynthesis pathways included in GapMind.* GapMind describes the biosynthesis of 17 amino acids and of chorismate, which is a precursor of the aromatic amino acids. GapMind does not include the biosynthesis of the other three amino acids (alanine, aspartate, or glutamate) because each of these is formed by the transamination of an intermediate from central metabolism (pyruvate, oxaloacetate, or  $\alpha$ -ketoglutarate, respectively). Amino acid transaminases are often non-specific and annotating their precise substrates is challenging (Price, Zane, et al. 2018), so we assume that enzymes that catalyze these three transamination reactions are present and that the amino acid can be produced.

Most of the pathways in GapMind were taken from the MetaCyc database of metabolic pathways and enzymes (Caspi et al. 2010). In addition, a few variant pathways that are not currently in MetaCyc are included in GapMind. These additional pathways are listed in Appendix 1 or are described below.

We tried to include all known pathways for amino acid biosynthesis that begin with intermediates in central metabolism and that occur in bacteria or archaea. Because most “free-living” bacteria and archaea can probably make all 20 standard amino acids (Price, Zane, et al. 2018), we also allow pathways to use other amino acids as starting points. For example, many microorganisms synthesize cysteine from serine and sulfide.

Our primary goal is to understand how a microbe might be able to grow with minimal nutrients, so we did not include pathways that correspond to unusual nutritional requirements. For example, GapMind does not include glycine synthesis from glycolate (Carini et al. 2013) or cysteine biosynthesis from sulfocysteine. Also, GapMind does not include cysteine biosynthesis from serine and methionine because prototrophic organisms would use the simpler “reverse transsulfuration” pathway from serine and homocysteine. A few pathways with uncertain occurrence in bacteria or archaea were also omitted (see Appendix 2). On the other hand, we included isoleucine biosynthesis from propionate because propionate is an end product of fermentation and need not be a nutritional requirement (Monticello et al. 1984).

*How GapMind represents pathways.* In GapMind, each pathway is broken down into a list of steps (Figure 1A). For heteromeric enzymes, each subunit is treated as a separate step. Alternate pathways are indicated by alternate lists of steps. To simplify the analysis of pathways with many variants, a pathway can include sub-pathways as well as steps. GapMind currently has 45 sub-pathways.

Most steps are described using enzyme commission (EC) numbers or terms (Figure 1B). To list the proteins that are known to carry out each step, GapMind compares EC numbers or terms to the curated descriptions of over 100,000 experimentally-characterized protein sequences. The biggest source of characterized proteins is Swiss-Prot (The UniProt Consortium 2017). GapMind also describes some steps using protein families from TIGRFam (Haft et al. 2013) or PFam (Finn et al. 2014) or by using proteins that we curated based on published papers or genetic data (see below).

Altogether, GapMind represents amino acid biosynthesis with 149 steps. These steps are associated with 1,821 different characterized proteins (including 99 proteins that we curated), 140 TIGRFams, and 4 PFams.

*How GapMind identifies candidates.* Given the proteins and families that are associated with each step, GapMind searches a genome of interest for candidates (Figure 1B). To search for similar proteins, it uses *tblastx* (Edgar 2010); to search for members of families, it uses HMMER (Eddy 2011). GapMind then uses *tblastx* to check if these candidates are similar to characterized proteins that have other functions. At this stage, GapMind compares the candidates to all characterized proteins, not just those involved in amino acid biosynthesis.

### A. Example pathway

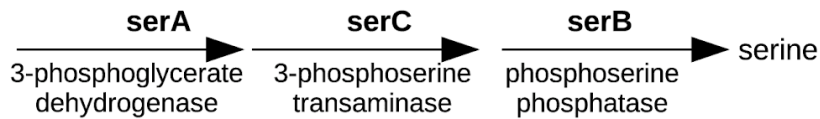

### B. Example step

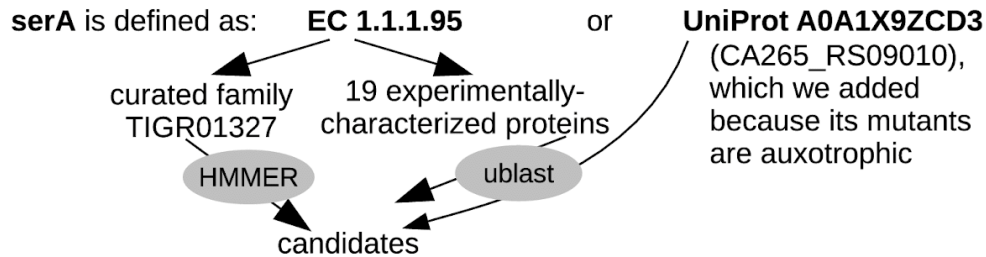

### C. Confidence levels for candidates from ublast

#### High confidence:

- Aligns at 40% identity
- Covers 80% of the characterized protein
- And candidate is less similar to proteins with other functions

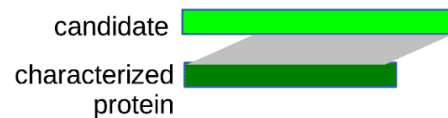

#### Medium confidence:

- Aligns at 30% identity and 80% coverage and less similar to proteins with other functions
- Or, 40% identity and 70% coverage (even if similar to proteins with other functions)
- Or, similar to a curated (uncharacterized) protein from Swiss-Prot

#### Low confidence:

- Aligns at 30% identity and 50% coverage (even if similar to proteins with other functions)

### D. Confidence levels for candidates from HMMER

#### High confidence:

- Scores above the trusted cutoff
- Alignment covers 80% of the HMM
- And candidate is <40% identical to proteins with other functions

#### Medium confidence:

- Scores above the trusted cutoff

**Figure 1: How GapMind works.** (A) A pathway with no variants. (B) The definition of a step. (C) Confidence levels for candidates from ublast. (D) Confidence levels for candidates from HMMER.

*Confidence levels for candidates, steps, and pathways.* Intuitively, a protein is a high-confidence candidate for a step if it is sufficiently similar to a protein that is known to carry out that step (Figure 1C & Figure 1D). For high-confidence candidates, GapMind requires 40% identity to a characterized protein with 80% coverage, or a match to a curated family with 80% coverage. We chose 40% identity as a threshold because more distantly-related enzymes often have

different substrates (Tian and Skolnick 2003). The 80% coverage requirement should ensure that all of the domains required for catalysis are present. GapMind also requires that the candidate be more similar to the characterized protein than to any protein known to have another function; this should ensure that most of the high-confidence candidates act on the correct substrates.

To identify moderate-confidence candidates, GapMind uses lower thresholds: down to 30% identity with 80% coverage (if not more similar to a protein with another function), 40% identity with 70% coverage (regardless of similarity to other proteins), or a hit to an HMM above the trusted cutoff (regardless of coverage or similarity to other proteins). To identify moderate-confidence candidates, GapMind also uses similarity to experimentally-uncharacterized proteins from bacteria and archaea that have curated enzyme annotations in Swiss-Prot. This adds another 45,090 sequences to the database that GapMind considers.

Candidates with at least 30% identity to a characterized or curated sequence and at least 50% coverage are considered low-confidence. These low-confidence candidates are shown on the GapMind website because they may be useful for filling gaps in amino acid biosynthesis pathways.

Given the confidence levels for the candidates, GapMind computes confidence levels for steps and pathways and finds the highest-confidence pathway for synthesizing each amino acid. The confidence of a step is the highest confidence of any candidate for that step. Steps are considered low-confidence even if they have no candidates at all. This ensures that pathways are considered even if they have gaps due to as-yet unknown variant enzymes. The confidence of a pathway is the lowest confidence of any step in that pathway.

*Fusion proteins.* GapMind's approach automatically handles fusion proteins. GapMind scores steps independently of each other, so a protein can be a high-confidence candidate for more than one step. Also, when GapMind tests if a candidate is similar to a protein with another function, it ignores hits that are outside of the relevant region of the candidate. So, if two enzymes are fused into one protein, GapMind will usually link the protein to both steps. In contrast, if genes were annotated using best hits, the fusion protein would have just one best hit and would be a candidate for at most one step. For example, as shown in Figure 2A, HSERO\_RS20920 from *Herbaspirillum seropedicae* SmR1 is a fusion of shikimate kinase (AroL) and 3-dehydroquinate synthase (AroB). The similarity of the C-terminal region to 3-dehydroquinate synthase scores more highly than the similarity of the N-terminal region to shikimate kinase, so a best hit approach might annotate the entire protein as AroB. In contrast, when testing whether HSERO\_RS20920 is a high-confidence candidate for AroB, GapMind ignores the alignments of the C-terminal part of the protein to 3-dehydroquinate synthases. Thus, HSERO\_RS20920 is a high-confidence candidate for both AroB and AroL.

### A. Fused AroL-AroB

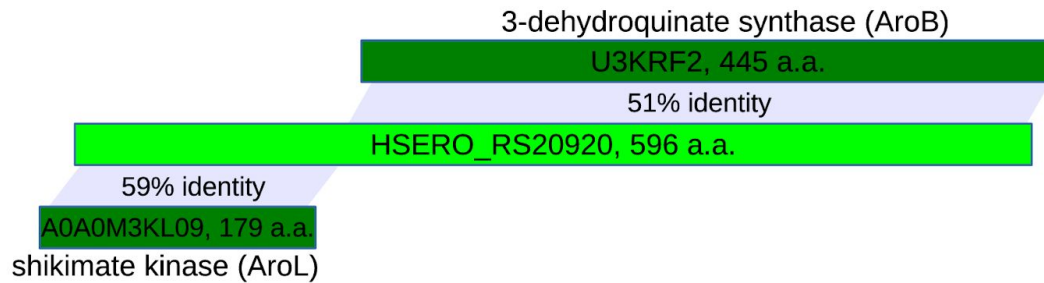

### B. Split methionine synthases

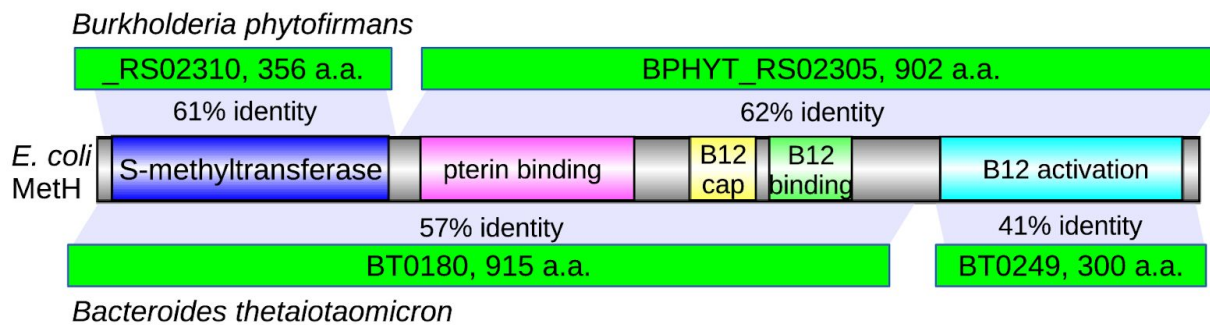

**Figure 2: GapMind handles fusion proteins and split proteins.** (A) HSERO\_RS20920 from *Herbaspirillum seropedicae* SmR1 is a fusion of AroL and AroB (shown with Swiss-Prot identifiers). (B) Split candidates for vitamin B12-dependent methionine synthase (MetH) in *Burkholderia phytofirmans* PsJN and *Bacteroides thetaiotaomicron* VPI-5482.

*Split proteins.* GapMind also looks for “split proteins,” where a multi-domain protein is split into two pieces. For instance, in *Escherichia coli*, the vitamin B12-dependent methionine synthase MetH is a single protein with five domains. In *Burkholderia phytofirmans* PsJN, BPHYT\_RS02305 contains the pterin-binding domain, the two domains involved in binding vitamin B12, and the domain for the reactivation of vitamin B12, while BPHYT\_RS02310 contains the S-methyltransferase domain (Figure 2B). In *Bacteroides thetaiotaomicron* VPI-5482, methionine synthase is split in a different way, with the reactivation domain in one protein (BT0249) and the other four domains in another protein (BT0180) (Figure 2B). GapMind automatically joins these proteins together based on the non-overlapping alignments of two pieces to the same characterized protein (Figure 2B). However, GapMind cannot detect more complicated arrangements, such as the splitting of methionine synthase from *Phaeobacter inhibens* into three proteins, together with a non-homologous system for the reactivation of vitamin B12 (Price, Zane, et al. 2018). These proteins from *P. inhibens* are also rather diverged from other methionine synthases, so we added a sub-pathway to describe the three-part methionine synthase.

## Expanding GapMind's database using genetic data

To improve GapMind, we tested it on 35 diverse bacteria that can make all 20 amino acids and for which we have large-scale genetic data from pools of transposon mutants (Price, Wetmore, et al. 2018; Price et al. 2019; Liu et al. 2019; Rand et al. 2017). The bacteria are listed in supplementary table S1. We previously used genetic data for 10 of these bacteria to fill some gaps in their amino acid biosynthetic pathways (Price, Zane, et al. 2018), and these previously-filled gaps were already incorporated into GapMind's database of characterized proteins. Nevertheless, across all the pathways, the average bacterium had 3.7 gaps, or steps that were on the best path but were not high-confidence. These gaps included 0.8 low-confidence steps and 2.9 medium-confidence steps per bacterium.

We used genetic data from these 35 bacteria growing in minimal media to identify the genes for many of the missing steps. We found evidence for two poorly-studied pathways and confirmed dozens of candidates that were divergent from previously-characterized proteins.

*Arginine synthesis with succinylated intermediates.* Our preliminary version of GapMind identified four gaps in arginine synthesis in *Bacteroides thetaiotaomicron* VPI-5482. First, at the beginning of the pathway, no candidates for N-acetylglutamate synthase (ArgA or ArgJ) were identified.

Second, neither ornithine carbamoyltransferase (ArgI) nor acetylornithine carbamoyltransferase were identified with high confidence. BT3717 was identified as a candidate for acetylornithine carbamoyltransferase, but BT3717 is nearly identical to a characterized enzyme from *Bacteroides fragilis* that acts on N-succinylornithine instead (Shi et al. 2006). In fact, *B. fragilis* was proposed to synthesize arginine via succinylated intermediates (Shi et al. 2006), instead of acetylated intermediates (Figure 3A & 3B). Furthermore, ArgB from *B. fragilis* is an N-succinylglutamate kinase, not an N-acetylglutamate kinase (Luque 2010), which confirms that *B. fragilis* uses succinylated intermediates. Unfortunately, as of June 2019, arginine synthesis with succinylated intermediates is not described in any of the standard databases (Swiss-Prot, MetaCyc, KEGG, or SEED), and BT3717 is misannotated in Swiss-Prot as acetylornithine carbamoyltransferase instead of succinylornithine carbamoyltransferase.

Third, GapMind identified BT3758 as a potential aminotransferase for converting N-acylglutamate semialdehyde to N-acylornithine, but with moderate confidence, because it was less than 40% identical to any characterized enzyme. Also, BT3758 is 38% identical to an aminotransferase that is involved in lysine biosynthesis ([LysW]-amino adipate semialdehyde transaminase from *Thermus thermophilus*; Swiss-Prot entry Q93R93), which creates some uncertainty about its role.

The final gap was argininosuccinate synthase (ArgH). BT3760 was identified as a moderate-candidate because it is less than 40% identical to any characterized enzyme.



Using the genetic data for *B. thetaiotaomicron*, we had previously identified that BT3761 participates in arginine biosynthesis (Liu et al. 2019). BT3761 is over 50% identical to the recently-discovered N-acetylglutamate synthase Cabys\_1732 (Kublanov et al. 2017), but given the activities of the other enzymes from *B. fragilis*, BT3761 is probably N-succinylglutamate synthase. The pathway with succinylated intermediates should also have a desuccinylating enzyme, most likely an N-succinylcitrulline desuccinylase (Figure 3B). The genetic data identified BT3549 as a candidate for this step (Figure 3C); BT3549 is distantly related (under 30% identity) to succinyl-diaminopimelate desuccinylase from *Mycobacterium tuberculosis* (Usha et al. 2016), which is a similar chemical reaction. The genetic data also confirmed that the best candidates for the other steps are indeed involved in arginine biosynthesis. Specifically, these genes are important for growth in a defined minimal medium that lacks arginine, but are not important for growth in rich media or in minimal media that was supplemented with arginine or with casamino acids, which includes arginine (Figure 3C).

### A. Standard pathway with acetylated intermediates

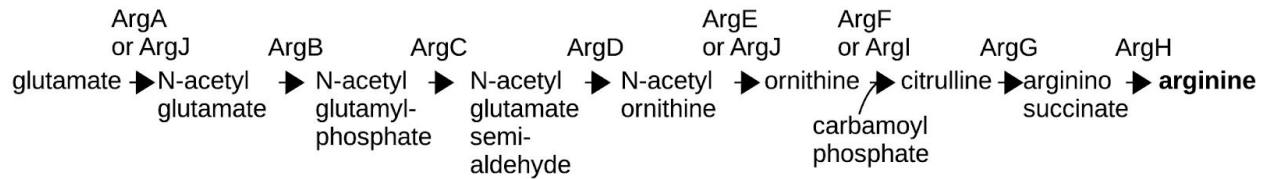

### B. *Bacteroidetes* pathway with succinylated intermediates

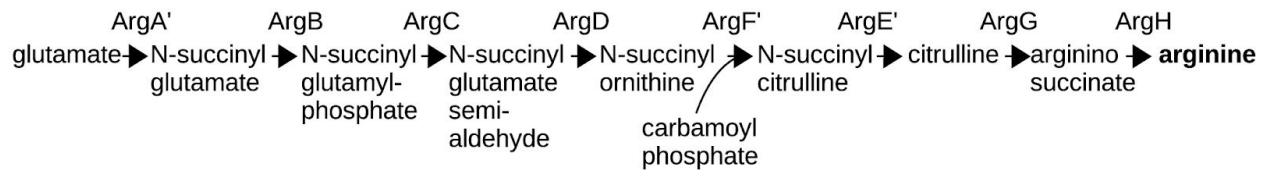

### C. Fitness data

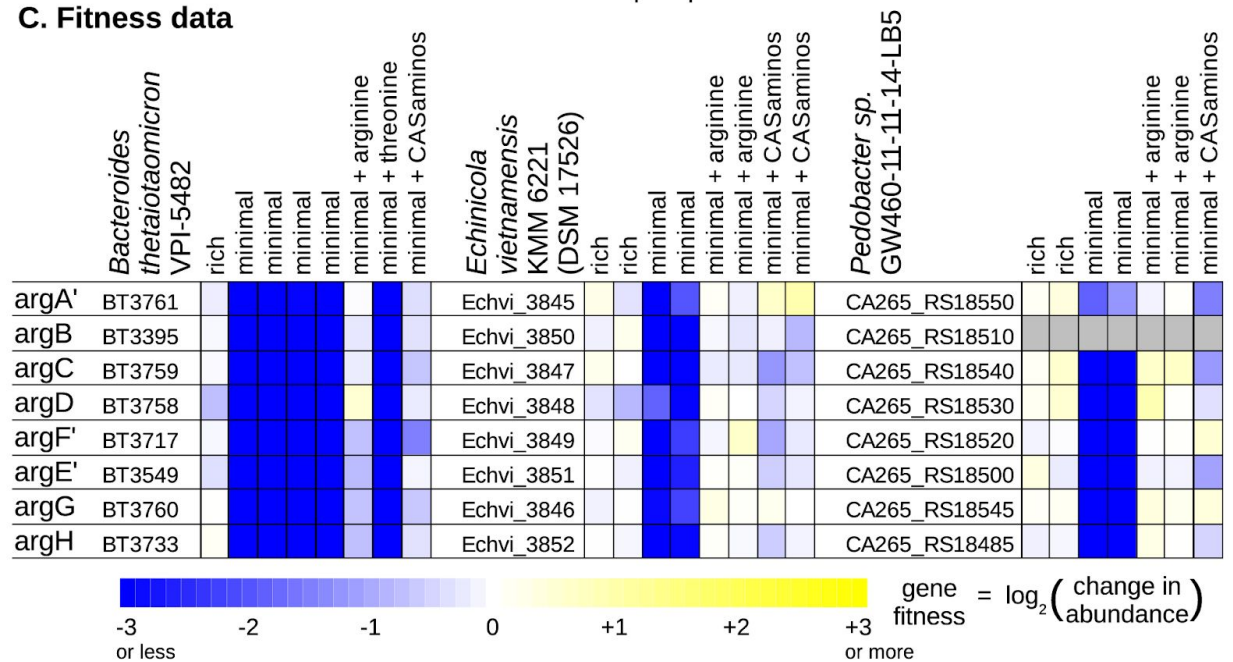

**Figure 3: Arginine biosynthesis with succinylated intermediates.** (A) The “standard” pathway. Proteins names are from *Escherichia coli* or *Bacillus subtilis*. The formation of carbamoyl phosphate (catalyzed by CarAB) is not shown. (B) The pathway in *Bacteroides* and in other Bacteroidetes. (C) Fitness data from *Bacteroides thetaiotaomicron* VPI-5482, *Echinicola vietnamensis* KMM 6221 (DSSM 17526), and *Pedobacter* sp. GW460-11-11-14-LB5 (from (Price, Wetmore, et al. 2018; Liu et al. 2019)). Each fitness value is the  $\log_2$  change in the abundance of the mutants in a gene during an experiment. Each experiment went from  $OD_{600} = 0.02$  to saturation (usually 4-8 doublings). Fitness values for CA265\_RS18510 were not estimated because mutants of this gene were at low abundance in the starting samples.

We also identified arginine synthesis with succinylated intermediates in two other bacteria from the phylum *Bacteroidetes* that we studied: *Echinicola vietnamensis* KMM 6221 and *Pedobacter*

sp. GW460-11-11-14-LB5. Most of the candidate genes in these two bacteria are also important for growth in defined media unless arginine or casamino acids are added (Figure 3C).

It appears that most members of the phylum Bacteroidetes synthesize arginine via succinylated intermediates. When we analyzed 106 genomes from this phylum (from MicrobesOnline, (Dehal et al. 2010)) using GapMind, we found that 70 (66%) had a high-confidence pathway for arginine biosynthesis with no gaps. In 69 of these 70 cases, the predicted pathway was the *Bacteroides*-type pathway. The exception was *Bacteroides pectinophilus* ATCC 43243, which has been reclassified to another phylum (Firmicutes) in the genome taxonomy database (GTDB; (Parks et al. 2018)). Also, the amino acid sequences of the carbamoyltransferases in the 69 Bacteroidetes confirm that they use succinylated intermediates. The specificity of the enzyme for N-succinylcitrulline or N-acetylcitrulline can be switched by mutating a single amino acid corresponding to position 90 of BT3717 (Shi et al. 2007). 61 of these 69 Bacteroidetes (89%) have amino acids at that position that cause a preference for N-succinylcitrulline (S, P, A, or V; (Shi et al. 2007)), and many of these genomes were previously predicted to encode N-succinylcitrulline carbamoyltransferase (Shi et al. 2007).

*Tyrosine synthesis from phenylalanine via phenylalanine hydroxylase.* Most bacteria synthesize tyrosine from chorismate via prephenate dehydrogenase or arogenate dehydrogenase, but in *Dyella japonica* UNC79MFTsu3.2, GapMind did not identify any medium- or high-confidence candidates for either enzyme. N515DRAFT\_1431 was identified as a low-confidence candidate, but it appears to be a fusion of two enzymes for phenylalanine biosynthesis: chorismate mutase and prephenate dehydratase.

When we searched the genetic data from *D. japonica* for auxotrophic genes, we identified a putative phenylalanine 4-hydroxylase (PAH; N515DRAFT\_3052) that is important for growth in defined media but not in rich media (Figure 4A). This suggested that PAH is the primary route for the biosynthesis of tyrosine in *D. japonica*, but bacterial PAH are usually described as the first step in the catabolism of phenylalanine. Indeed, PAH from *D. japonica* is over 60% identical to a protein that is important for the utilization of phenylalanine as a carbon or nitrogen source (RR42\_RS20365 from *Cupriavidus basilensis* 4G11; data of (Price, Wetmore, et al. 2018)). On the other hand, a biosynthetic role for bacterial PAH has been proposed before: in *Legionella pneumophila* 130b, PAH is involved in pyomelanin biosynthesis and a PAH mutant has reduced growth in a tyrosine-free defined medium (Flydal et al. 2012). GapMind's analysis suggests that *L. pneumophila* also lacks arogenate dehydrogenase and prephenate dehydrogenase.

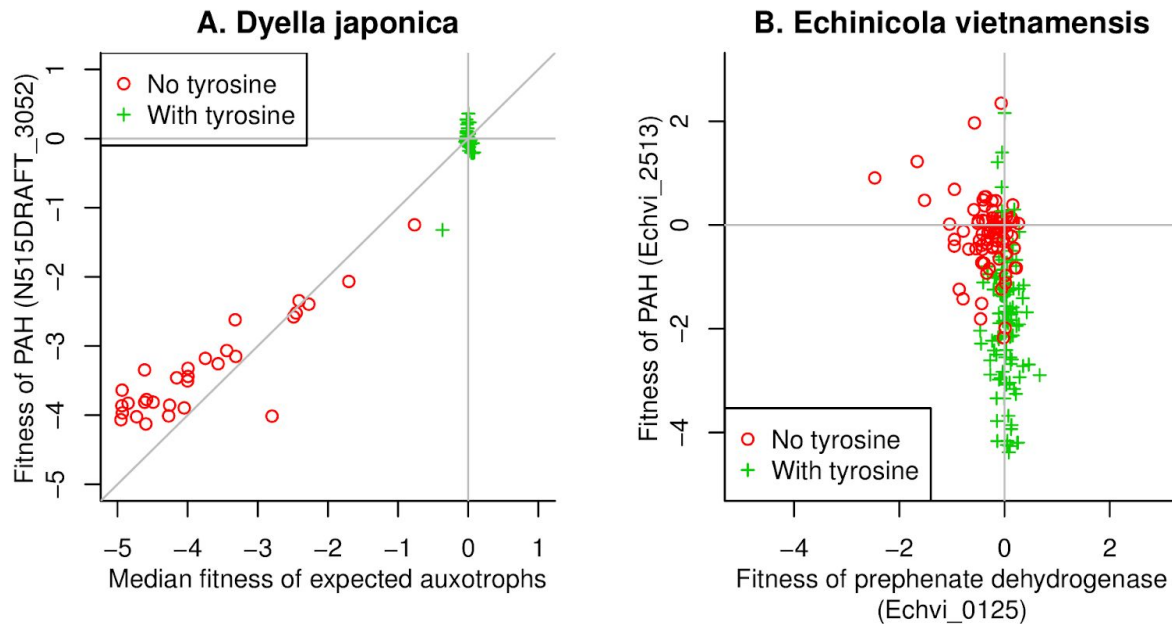

**Figure 4: Tyrosine synthesis via phenylalanine hydroxylase in *Dyella japonica* and *Echinicola vietnamensis*.** (A) Gene fitness in *Dyella japonica* UNC79MFTsu3.2. The x axis shows the median fitness across 59 genes that are predicted to be involved in amino acid biosynthesis (by TIGRFam role, (Haft et al. 2013)) and the y axis shows the fitness of the predicted phenylalanine hydroxylase (PAH). (B) Gene fitness in *Echinicola vietnamensis* KMM 6221 (DSM 17526) for prephenate dehydrogenase (x axis) and for PAH (y axis). In both panels, we color code experiments by whether or not tyrosine was present in the media. The media with tyrosine usually included it via yeast extract or casamino acids, while the media without tyrosine are defined media with just one or no amino acids added. Lines show  $x = 0$  and  $y = 0$ , corresponding to no effect of mutating the genes. In panel (A), a line shows  $x = y$ .

We also noticed that in *Echinicola vietnamensis*, PAH (Echvi\_2513) is important for growth in some defined media (Figure 4B). This bacterium also has a prephenate or arogenate dehydrogenase (Echvi\_0125), which is important for growth in some defined media, but not others (Figure 4B). It is difficult to understand why PAH is important for fitness in defined media unless it is involved in tyrosine biosynthesis. Conversely, a biosynthetic role for PAH would explain why the prephenate or arogenate dehydrogenase appears to be dispensable in some defined media. Also, the two genes seem to be important for fitness in different conditions, which is consistent with genetic redundancy. (There are no experiments where both genes had fitness values under -1, which corresponds to a 2-fold reduction in abundance of mutant strains.) So, we propose that *E. vietnamensis* uses both routes for the biosynthesis of tyrosine.

Because PAH appears to be a major route for tyrosine biosynthesis in *Dyella japonica*, *Legionella pneumophila*, and *Echinicola vietnamensis*, we included PAH in GapMind. Besides phenylalanine, the other substrates for this enzyme are molecular oxygen and a pterin cofactor, so this pathway cannot function under anaerobic conditions.

*Confirming the roles of diverged enzymes.* Besides adding two pathways, we used the genetic data to confirm that 43 divergent candidates that were predicted to be involved in amino acid biosynthesis were important for growth in minimal media (supplementary table S2). Most of these candidates were originally considered to be moderate confidence (23/43) or low confidence (5/43); one diverged candidate was not identified by the preliminary version of GapMind; and the remaining 14 candidates had already been classified as high confidence. Most of the diverged candidates were already annotated in UniProt with the functions that we confirmed; the six exceptions are explained in supplementary table S2.

In four cases, we are confident that the protein is involved in the pathway, but we cannot predict its precise activity. Tyrosine biosynthesis can proceed either from prephenate to 4-hydroxyphenylpyruvate to tyrosine (a dehydrogenase reaction followed by an aminotransferase reaction) or from prephenate to arogenate to tyrosine (an aminotransferase reaction followed by a dehydrogenase reaction). Four proteins were similar to both prephenate dehydrogenases and arogenate dehydrogenases, and the genetic data confirmed that they were important for fitness in minimal media unless a mixture of amino acids is added. This confirms these proteins are involved in amino acid biosynthesis, but we still do not know whether they act on prephenate, arogenate, or both. In the updated GapMind, these proteins (and their homologs) are considered as good candidates for either activity.

Some of the diverged candidates were essential for viability in the rich media used to construct the mutant libraries. Essentiality is common for amino acid biosynthesis genes (Price, Zane, et al. 2018) but does not give a clear indication as to the gene's role. If similar candidates from related bacteria were both essential, and no other good candidates were detected, then we reasoned that the genes were probably annotated correctly and we added them to GapMind's database. Using this approach, we added another 17 proteins to GapMind's database. Nine of these proteins are candidates for steps that are essential in most bacteria: AspS2, GltX, or DapB. (AspS2 and GltX are involved in both amino acid biosynthesis and the charging of transfer RNAs, and DapB is involved in the biosynthesis of both lysine and peptidoglycan.)

## Many gaps in amino acid biosynthesis in diverse prokaryotes

After we updated GapMind based on the genetic data, the amino acid biosynthesis pathways in the 35 bacteria still have 31 gaps: 15 low-confidence steps and 16 medium-confidence steps are on the best paths (Table 1). Six of these gaps are spurious: they reflect errors in the genome sequence or omissions in the protein annotation (Appendix 3). Another 11 of the 31 gaps are due to diverged enzymes: there is a reasonable candidate for the step that is too diverged from characterized proteins to be called high-confidence. In 10 of these cases, the gene appears to be essential (Price, Wetmore, et al. 2018). In the remaining case, mutants in the gene (N515DRAFT\_4305 from *D. japonica*) had low abundance in the pool of transposon mutants, so we were not able to confirm that these mutants were auxotrophic. The remaining 14

gaps seem to indicate novel biology that remains to be discovered (Table 1). We will describe two of these cases in more detail.

First, GapMind did not identify high-confidence candidates for any of the three steps of serine biosynthesis in either *Desulfovibrio vulgaris* Hildenborough or *D. vulgaris* Miyazaki F, which are both strictly-anaerobic sulfate-reducing bacteria. In addition, the genetic data did not identify candidate genes for these steps. We also considered whether serine might be formed from glycine: although glycine is usually formed from serine, it might also form by the glycine cleavage reaction in reverse, which may be thermodynamically feasible if one-carbon substrates such as formate reach high concentrations (see Appendix 2). However, genes from the glycine cleavage system were not important for the growth of either strain of *D. vulgaris* in minimal media (V. V. Trotter, personal communication; data of (Price, Wetmore, et al. 2018; Price et al. 2019; Liu et al. 2019; Rand et al. 2017)). Also, a metabolic labeling study suggests that *D. vulgaris* Hildenborough forms serine from glycolytic intermediates (Tang et al. 2007), which is consistent with the standard pathway but not with the glycine cleavage reaction in reverse. So serine biosynthesis in *Desulfovibrio vulgaris* remains unresolved.

**Table 1: Remaining gaps in amino acid biosynthesis across 35 bacteria.**

| Type of gap | Pathway: gap          | Organism                                           | Comment                                                                                                                                                                                                               |
|-------------|-----------------------|----------------------------------------------------|-----------------------------------------------------------------------------------------------------------------------------------------------------------------------------------------------------------------------|
| novel       | Histidine: HisN       | <i>Synechococcus elongatus</i> PCC 7942            | Synpcc7942_1763 is a candidate for histidinol phosphatase, but is not required for growth.                                                                                                                            |
| novel       | Lysine: DapCE or DapL | <i>Echinicola vietnamensis</i> KMM 6221, DSM 17526 | Echvi_3551 is a good candidate for the succinyltransferase DapD, which suggests succinylated intermediates, but DapC and DapE are missing. Or Echvi_0124 might be a diverged diaminopimelate aminotransferase (DapL). |
| novel       | Lysine: DapE          | <i>Pedobacter</i> sp. GW460-11-11-14-LB5           | No convincing candidate for the desuccinylase DapE was found.                                                                                                                                                         |
| novel       | Serine: SerACB        | <i>Desulfovibrio vulgaris</i> Hildenborough        | This genome does not seem to encode the standard SerACB pathway of serine synthesis                                                                                                                                   |
| novel       | Serine: SerACB        | <i>Desulfovibrio vulgaris</i> Miyazaki F           | This genome does not seem to encode the standard SerACB pathway of serine synthesis                                                                                                                                   |
| novel       | Serine: SerB          | <i>Dyella japonica</i> UNC79MFTsu3.2               | This genome has several weak candidates for phosphoserine phosphatase.                                                                                                                                                |
| novel       | Serine: SerB          | <i>Synechococcus elongatus</i> PCC 7942            | Synpcc7942_2078 is a candidate for phosphoserine phosphatase, but is not required growth.                                                                                                                             |
| novel       | Threonine: ThrB       | <i>Bacteroides thetaiotaomicron</i> VPI-5482       | This genome does encode a standard threonine synthase or ThrC (BT2401).                                                                                                                                               |
| novel       | Threonine: ThrB       | <i>Dinoroseobacter shibae</i> DFL-12               | This genome does encode a standard threonine synthase or ThrC (Dshi_1146).                                                                                                                                            |
| novel       | Threonine: ThrB       | <i>Phaeobacter inhibens</i> BS107                  | This genome does encode a standard threonine synthase or ThrC (PGA1_c06310).                                                                                                                                          |
| diverged    | Chorismate: AroA      | <i>Echinicola vietnamensis</i> KMM 6221, DSM 17526 | Echvi_0122 may be a diverged AroA. It appears to be essential (Price, Wetmore, et al. 2018).                                                                                                                          |
| diverged    | Cysteine: CysE        | <i>Echinicola vietnamensis</i> KMM 6221, DSM 17526 | Echvi_0221 may be a diverged serine acetyltransferase. It appears to be essential (Price, Wetmore, et al. 2018).                                                                                                      |

|          |                          |                                                       |                                                                                                                                                                                                                                                                 |
|----------|--------------------------|-------------------------------------------------------|-----------------------------------------------------------------------------------------------------------------------------------------------------------------------------------------------------------------------------------------------------------------|
| diverged | Histidine:<br>HisN       | <i>Desulfovibrio vulgaris</i><br>Hildenborough        | DVU2940 may be a diverged histidinol phosphatase. It appears to be essential (V. V. Trotter, personal communication).                                                                                                                                           |
| diverged | Histidine:<br>HisN       | <i>Desulfovibrio vulgaris</i><br>Miyazaki F           | DvMF_0940 may be a diverged histidinol phosphatase. It appears to be essential (Price, Wetmore, et al. 2018).                                                                                                                                                   |
| diverged | Histidine:<br>HisC       | <i>Synechococcus elongatus</i><br>PCC 7942            | Synpcc7942_1030 may be a diverged histidinol-phosphate aminotransferase. It appears to be essential (Rubin et al. 2015).                                                                                                                                        |
| diverged | Leu/Ile/Val:<br>IlvI     | <i>Dyella japonica</i><br>UNC79MFTsu3.2               | Various strains of <i>Dyella japonica</i> have a short IlvI (regulatory subunit of acetolactate synthase), i.e. N515DRAFT_0566.                                                                                                                                 |
| diverged | Methionine:<br>MetC      | <i>Dyella japonica</i><br>UNC79MFTsu3.2               | This organism probably uses the transsulfuration pathway (MetB = N515DRAFT_4363 is important for growth in minimal media). N515DRAFT_4305 is likely to be cystathionine beta-lyase (MetC), but it is also very similar to a cystathionine gamma-lyase (Q5H4T8). |
| diverged | Phenylalanine:<br>Pdehyd | <i>Synechococcus elongatus</i><br>PCC 7942            | Synpcc7942_0881 may be a diverged prephenate dehydratase. It appears to be essential (Rubin et al. 2015).                                                                                                                                                       |
| diverged | Serine:<br>SerC          | <i>Echinicola vietnamensis</i><br>KMM 6221, DSM 17526 | Echvi_1811 may be a phosphoserine aminotransferase. It appears to be essential (Price et al. 2016).                                                                                                                                                             |
| spurious | Chorismate:<br>AroL      | <i>Azospirillum brasilense</i><br>Sp245               | An open reading frame with 41% identity to AROK_ECOLI is present but no protein was predicted                                                                                                                                                                   |
| spurious | Chorismate:<br>AroC      | <i>Shewanella oneidensis</i><br>MR-1                  | A frameshift error splits AroC into two reading frames (SO3078.2 and SO_3079).                                                                                                                                                                                  |
| spurious | Histidine:<br>HisD       | <i>Azospirillum brasilense</i><br>Sp245               | A frameshift error in the genome sequence prevented this protein from being predicted (Price, Zane, et al. 2018)                                                                                                                                                |
| spurious | Histidine:<br>Prs        | <i>Pseudomonas fluorescens</i><br>FW300-N1B4          | An open reading frame with 67% identity to KPRS_ECOLI is present but no protein was predicted                                                                                                                                                                   |
| spurious | Methionine:<br>MetZ      | <i>Pseudomonas fluorescens</i><br>FW300-N1B4          | The published assembly is missing a region that has an open reading frame with 84% identity to METZ_PSEAE.                                                                                                                                                      |
| spurious | Serine:<br>SerC          | <i>Azospirillum brasilense</i><br>Sp245               | An open reading frame with 58% identity to SERC_METBF is present but no protein was predicted                                                                                                                                                                   |

Second, *B. thetaiotaomicron* does not seem to contain homoserine kinase (ThrB). The curators at TIGRFam proposed that TIGR02535 might replace homoserine kinase by transferring phosphate groups from a donor such as phosphoenolpyruvate to homoserine. TIGR02535 is related to phosphoglycerate mutases, which transfer phosphate groups, and is often adjacent to other genes for threonine synthesis. *B. thetaiotaomicron* does not seem to contain a traditional homoserine kinase but it does contain a member of TIGR02535 (BT2402). Mutants in BT2402 were important for growth in minimal media unless threonine was added (data of (Liu et al. 2019)). However, when BT2402 was introduced into a *thrB*- strain of *E. coli*, no growth in minimal media was observed (Hualan Liu, personal communication). Therefore it remains uncertain whether BT2402 catalyzes the formation of O-phosphohomoserine or if it has another role in threonine synthesis. Two of the other bacteria we studied genetically, *Phaeobacter inhibens* and *Dinoroseobacter shibae*, also seem to lack homoserine kinase, but they do not contain members of TIGR02535.

Overall, we used the genetic data to reduce the total number of gaps in the 35 bacteria with genetic data from 130 to 31. 17 of the remaining gaps can be explained; the other 14 gaps are due to our limited understanding of amino acid biosynthesis in bacteria.

We then tested GapMind on a more diverse collection of 150 bacteria and archaea that can grow in the absence of any amino acids (from (Dos Santos et al. 2012; Oberhardt et al. 2015); supplementary table S3). These microbes represent 19 phyla and 132 genera (as classified by GTDB, (Parks et al. 2018)). Most of them are distantly related to the 35 bacteria that we have genetic data for: just 15 of the 150 belong to the same genus, and none of them belong to the same species. Across all pathways, the 150 microbes had an average of 5.2 gaps, including 1.8 low-confidence steps and 3.4 medium-confidence steps (Figure 5). The most common low-confidence steps were histidinol-phosphate phosphatase (HisN), which was low-confidence in 42 organisms (28%), and homoserine kinase (ThrB), which was low-confidence in 29 organisms (19%). Of the 29 organisms that seem to lack ThrB, 15 contain the putative alternative enzyme (TIGR02535).

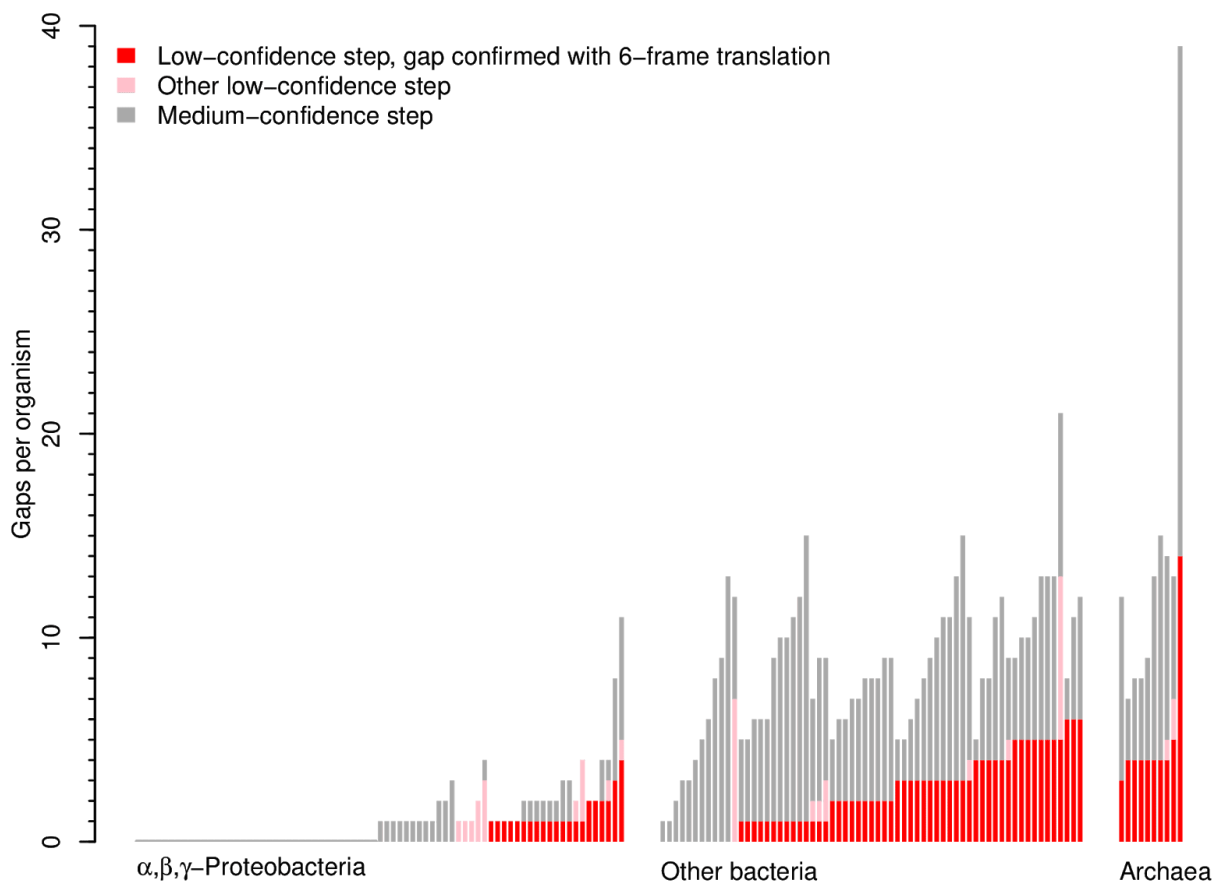

**Figure 5: Number of gaps in amino acid biosynthesis in 150 diverse bacteria and archaea that can grow without amino acids.** (These are distinct from the 35 bacteria with fitness data.)



To verify that the low-confidence steps reflect gaps in our knowledge of amino acid biosynthesis, we manually examined a random sample of 20 of them (supplementary table S4). None of these steps could be confidently associated with a protein sequence. We did identify potential candidates for 10 of the steps, but the candidates were quite distantly related to characterized proteins (30% identity or less). Just one of these 20 gaps could be explained by a frameshift error or a missing gene call. More broadly, few of the gaps seem to be due to errors in the genome or in protein prediction: when we analyzed the six-frame translation of all 150 genomes, most of the gaps remained. In particular, of 270 gaps that were low-confidence steps when analyzing the annotated proteins, 232 (86%) were still gaps (that is, on the best path but not high-confidence) when analyzing the six-frame translation.

We also examined the microbe with the most gaps, which was the hyperthermophilic archaeon *Pyrolobus fumarii* 1A. Although *P. fumarii* can grow with carbon dioxide as the sole source of carbon (Blöchl et al. 1997), its amino acid biosynthesis pathways had 14 gaps that were low-confidence steps. Because some steps appear in more than one pathway, these gaps correspond to 11 missing proteins. We manually searched for these 11 missing proteins and found convincing candidates for just three of them (AroD, TrpA, and TrpB). The candidates for AroD (PYRFU\_RS04235) and TrpA (PYRFU\_RS05090) were already annotated with these functions in RefSeq, but they are too diverged from proteins in GapMind's database to be medium-confidence. The candidate for TrpB (PYRFU\_RS05405) was annotated as a TrpB-like protein in RefSeq. The other 8 missing proteins are genuine gaps.

Members of the  $\alpha,\beta,\gamma$ -Proteobacteria had far fewer gaps than other bacteria or archaea (Figure 5). For instance, of 75  $\alpha,\beta,\gamma$ -Proteobacteria that we analyzed, 37 (49%) had no gaps, while all of the other microbes had at least one gap. We believe that the  $\alpha,\beta,\gamma$ -Proteobacteria have fewer gaps for two reasons: they are the best-studied group of prokaryotes, and they include 29 of the 35 bacteria that have genetic data and that we used to improve GapMind. If we “censored” GapMind to remove the improvements that we described above, and to ignore biosynthetic proteins that we had previously identified using the genetic data (Price, Zane, et al. 2018), then the number of gaps in these 75  $\alpha,\beta,\gamma$ -Proteobacteria rose from an average of 1.1 to 3.9. It appears that we have already filled most of the gaps in amino acid biosynthesis in the  $\alpha,\beta,\gamma$ -Proteobacteria, but most other prokaryotes that can grow in minimal media still have unknown steps in their amino acid biosynthesis pathways.

## Identifying known gaps

In our analysis, we found that the gaps in amino acid biosynthesis pathways were often conserved between related organisms. For 96 of the 150 microbes, the set included another microbe from the same family (as classified by GTDB). We focused on the gaps that were assigned low-confidence and that were confirmed by analyzing the six-frame translation. The 96 microbes had 118 such gaps, and 96 of these steps (81%) were also gaps in a related microbe from the family.

The conservation of most gaps implies that “known gaps” will be useful for understanding other organisms. If a new genome appears to have a gap, but it is related to an organism that has the same gap and grows in minimal media, then this known gap should not be considered as evidence that the organism lacks the pathway. We built a catalog of 257 known gaps in amino acid biosynthesis by combining the 25 genuine gaps in the bacteria with genetic data (Table 1) with the 232 gaps from diverse prokaryotes that were low-confidence steps and were confirmed by analyzing the six-frame translation.

To identify a known gap in a new genome, GapMind compares all of its predicted proteins to the ribosomal proteins from organisms with known gaps. If the median similarity of the ribosomal proteins is above 75%, and the related organism has the same gap, then GapMind marks the gap as known. 75% similarity across ribosomal proteins corresponds roughly to belonging to the same family in GTDB (see Methods).

## Tests on bacteria that cannot make all amino acids

To show that GapMind gives reasonable results for bacteria that cannot synthesize all of the amino acids, we tested it on three bacteria with experimentally-determined requirements for one or more of the amino acids: *Lactobacillus helveticus* CNRZ 32, which is auxotrophic for 12 of the amino acids that GapMind represents (Christensen and Steele 2003); *Enterococcus faecalis* V583, which is auxotrophic for seven amino acids (Veith et al. 2015), and *Clostridium scindens* ATCC 37504, which is able to synthesize all of the amino acids except tryptophan (Devendran et al. 2019). Across these three bacteria, GapMind classified one or more steps as low-confidence for 19 out of the 20 amino acids that are required for growth. In contrast, GapMind identified low-confidence step(s) for just 1 of 31 amino acids that the three bacteria can synthesize. The mis-classified cases were lysine synthesis in *L. helveticus* and serine synthesis in *E. faecalis*. Although *L. helveticus* requires lysine for growth (Christensen and Steele 2003), the biosynthetic pathway appears to be complete except for the acetyl-diaminopimelate aminotransferase DapX; GapMind identified a medium-confidence candidate for DapX. Conversely, *E. faecalis* is reported to grow in the absence of serine, but GapMind identified only low-confidence candidates for SerA or SerB, and a medium-confidence candidate for SerC. Similarly, in a metabolic model of *E. faecalis* (Veith et al. 2015), only one of the three reactions is present (SerA or 3-phosphoglycerate dehydrogenase). It is not clear how *E. faecalis* can grow without added serine. Overall, we observed good agreement between which pathways that have low-confidence steps and which amino acids are required for growth.

Besides the amino acids that are represented in GapMind, *L. helveticus* also requires glutamate (Christensen and Steele 2003), and it requires either aspartate or asparagine unless citrate is provided (Christiansen et al. 2008). Citrate can probably alleviate the requirement for aspartate or asparagine because citrate can be cleaved to oxaloacetate (Christiansen et al. 2008), which is the carboxylic acid precursor for aspartate. Similarly, the requirement for glutamate probably indicates that *L. helveticus* cannot make  $\alpha$ -ketoglutarate (Christiansen et al. 2008). Because GapMind does not represent central metabolism, it does not model these dependencies.

## The GapMind website

At the GapMind website (<http://papers.genomics.lbl.gov/gaps>), you can select a genome from various resources, including NCBI's database of assemblies, or you can upload a fasta file of predicted protein sequences. Once you select a genome, the analysis takes about 15 seconds. Analysis results are stored indefinitely, but if GapMind's database has been updated to include new pathways or enzymes, the analysis will be rerun.

### Amino acid biosynthesis in *Desulfovibrio alaskensis* G20

| Pathway           | Steps                                                                                                |
|-------------------|------------------------------------------------------------------------------------------------------|
| <b>arg</b>        | <b>argJ, argB, argC, argD, carA, carB, argI, argG, argH</b>                                          |
| <b>asn</b>        | <b>aspS2, gatA, gatB, gatC</b>                                                                       |
| <b>chorismate</b> | <b>tpiA, fbp, asp_kinase, asd, aroA', aroB', aroD, aroE, aroL, aroA, aroC</b>                        |
| <b>cys</b>        | <b>cysE, cysK</b>                                                                                    |
| <b>gln</b>        | <b>gltX, gatA, gatB, gatC</b>                                                                        |
| <b>gly</b>        | <b>glyA</b>                                                                                          |
| <b>his</b>        | <b>prs, hisG, hisI, hisE, hisA, hisF, hisH, hisB, hisC, hisN, hisD</b>                               |
| <b>ile</b>        | <b>cimA, leuC, leuD, leuB, ilvI, ilvH, ilvC, ilvD, ilvE</b>                                          |
| <b>leu</b>        | <b>ilvH, ilvI, ilvC, ilvD, leuA, leuC, leuD, leuB, ilvE</b>                                          |
| <b>lys</b>        | <b>asp_kinase, asd, dapA, dapB, DAPtransferase, dapE, lysA</b>                                       |
| <b>met</b>        | <b>asp_kinase, asd, asd_S_transferase, asd_S_ferredoxin, asd_S_perS, meth, B12_reactivation_RamA</b> |
| <b>phe</b>        | <b>cmutase, pdehyd, ilvE</b>                                                                         |
| <b>pro</b>        | <b>proB, proA, proC</b>                                                                              |
| <b>ser</b>        | <b>serA?, serC, serB?</b>                                                                            |
| <b>thr</b>        | <b>asp_kinase, asd, hom, thrB, thrC</b>                                                              |
| <b>trp</b>        | <b>trpE, trpD_1, trpD_2, PRAI, IGPS, trpA, trpB</b>                                                  |
| <b>tyr</b>        | <b>cmutase, predehyd, tyrB</b>                                                                       |
| <b>val</b>        | <b>ilvH, ilvI, ilvC, ilvD, ilvE</b>                                                                  |

Confidence: **high confidence** medium confidence **low confidence**

? - known gap: despite the lack of a good candidate for this step, this organism (or a related organism) performs the pathway

**Figure 6: GapMind's website renders the best paths for amino acid biosynthesis in *Desulfovibrio alaskensis* G20.** Each step is color coded by its confidence level and "?" indicates known gaps in related organisms.

After analysis, the main page for the organism lists the best path for each amino acid (Figure 6). Gaps are highlighted by color, and known gaps are marked (such as serA or serB in Figure 6). Each step has hover text with a description of the enzymatic step and the identifier of the top candidate. Clicking on a pathway or step leads to more detailed pages. The page for each step includes how the step was defined and search tools to find additional candidates, including Curated BLAST (Price and Arkin 2019), which can find reading frames that were not annotated. The page for each candidate includes links to tools for analyzing the protein's sequence, including PFam (Finn et al. 2014); the conserved domain database (CDD) (Marchler-Bauer et al. 2015); and PaperBLAST, which finds papers about a protein and its homologs (Price and Arkin 2017); The candidate page also includes a link to the actual alignments that led to the identification of the candidate.

## Discussion

GapMind is based on careful curation of a subset of biosynthetic pathways across many prokaryotes that are known to have these capabilities. In contrast to genome-scale metabolic modeling, a pathway-centric approach allows curation effort to focus on the reactions that are most relevant to the capabilities of interest. Because of this, GapMind implicitly assumes that all intermediates in central metabolism are available. This is likely to be true if the microbe contains most of the amino acid biosynthesis pathways, but it might not be true for microbes that have many auxotrophies, such as *Lactobacillus helveticus* CNRZ 32. GapMind also assumes that other amino acids are available, but if this is not likely to be the case, it should be obvious from GapMind's results.

GapMind relies on the predicted proteins in the genome annotation. Omissions in the list of predicted proteins or errors in the genome sequence sometimes lead to spurious gaps. For most of the individual steps, the GapMind website provides links to Curated BLAST for Genomes, which can find candidates that have frameshifts or were not annotated as proteins (Price and Arkin 2019). Curated BLAST can also be useful for finding highly diverged candidates that are less than 30% identical to the characterized or curated proteins for that step (especially if there is no TIGRFam for that step).

GapMind uses the similarity of protein sequences to rate the confidence of candidates. There are many other features that could be used. In particular, we did not incorporate specificity-determining residues (i.e., (Bastard et al. 2017; Shi et al. 2007)) into GapMind because this information is available for few enzyme families. GapMind also does not consider whether a candidate gene clusters with other proteins in the pathway. Genomic context may be taken into account indirectly via the curation effort behind TIGRFam or Swiss-Prot (although Swiss-Prot annotations never lead to high-confidence assignments in GapMind unless they are based on experimental evidence).

The GapMind code should be suitable for reconstructing other metabolic capabilities such as vitamin synthesis or sugar catabolism. Adding new pathways requires curation effort to describe multi-subunit enzymes and to describe reactions that do not have EC numbers. In retrospect, using a different database of characterized proteins might have made it easier to incorporate new pathways into GapMind. In particular, both Swiss-Prot and MetaCyc represent protein complexes and link proteins to the Rhea database of biochemical reactions (Morgat et al. 2015), which is more specific and complete than the EC classification. So, it might be possible to automatically convert many MetaCyc pathways for use in GapMind. When adding a new pathway, it's also important to check the quality of the results and to identify enzymes with ambiguous or incorrect descriptions that should be ignored. This could be partially automated if the growth capabilities and the genomes of many microbes were available.

In conclusion, GapMind quickly identifies potential pathways for amino acid biosynthesis in a microbial genome. For most bacteria that can synthesize all 20 amino acids, GapMind identifies just a few missing steps or gaps, and the GapMind website provides interactive tools to investigate these gaps. To indicate that a gap may correspond to novel biology (instead of a missing capability), GapMind reports if a related microbe that has the same gap is known to grow in minimal media. To fill some of the gaps in our understanding of amino acid biosynthesis, we tested a preliminary version of GapMind against diverse bacteria with genetic data. We identified additional genes involved in arginine synthesis with succinylated intermediates in Bacteroidetes; we proposed that *Dyella japonica* synthesizes tyrosine from phenylalanine; and we annotated dozens of divergent enzymes based on genetic data. However, we still do not understand how most bacteria or archaea can make all 20 amino acids.

## Materials and Methods

### Data sources

Pathways were taken from MetaCyc's website (accessed January-April 2019).

Experimentally characterized proteins were taken from the curated part of PaperBLAST's database in January 2019. PaperBLAST only incorporates the subset of Swiss-Prot with experimental evidence, but some of these proteins only have evidence as to their expression, not their function. Also, EcoCyc (Keseler et al. 2005) and CharProtDB (Madupu et al. 2012) contain significant numbers of uncharacterized proteins. Proteins were deemed uncharacterized and were filtered out if the description began with "uncharacterized" or matched "uncharacterized protein", "DUFnnnn family protein", "PFnnnnn family protein", or "UPFnnnnn family protein." Also, for EcoCyc and CharProtDB, descriptions beginning with "putative" or "protein" were filtered out, and for CharProtDB, descriptions beginning with "probably" were filtered out. This left 113,710 different sequences: 84,815 from Swiss-Prot; 21,497 from BRENDA (Placzek et al. 2017); 8,629 from CAZy (Lombard et al. 2014); 7,397 from CharProtDB; 6,474 from MetaCyc; 3,441 from EcoCyc; 2,749 from REBASE (Roberts et al. 2015); and 1,319 re-annotations based on genetic data from the Fitness Browser (Price, Wetmore, et al. 2018). (These numbers sum to more than the number of sequences because of overlap between databases.) Previously-filled gaps in amino acid biosynthesis (Price, Zane, et al. 2018) were incorporated via the Fitness Browser's reannotations.

Curated proteins were taken from Swiss-Prot (downloaded in April 2019). To keep the database small, we only used proteins from bacteria or archaea that were annotated as enzymes (with an EC number, even if incomplete). We excluded fragment proteins and proteins with "CAUTION" comments (which indicate uncertainty as to whether the annotation is correct). We then clustered the sequences at 60% identity (using `usearch -cluster_fast`). If the EC assignments within a cluster varied, we split the cluster by EC number. We then arbitrarily selected one sequence from each cluster, giving a secondary database of 45,090 curated sequences.

As sources of protein families, we used the most recent release of TIGRFam (15.0) and PFam release 32.0 (from September 2018).

Fitness data was taken from the Fitness Browser (<http://fit.genomics.lbl.gov>).

## Microbes that can make all of the amino acids

For the 35 bacteria with genetic data, we have grown 34 of them in minimal media with no amino acids present. For *Bacteroides thetaiotaomicron* VPI-5482, our defined medium includes cysteine and methionine, but these are not required for growth by this strain (Varel and Bryant 1974).

To identify genome sequences for additional microbes that can make all of the amino acids, we used two sources: a comparative genomics analysis of nitrogen-fixing bacteria and archaea (Dos Santos et al. 2012) and the KOMODO database of organism-media pairings (Oberhardt et al. 2015). Using the strain-level identifiers, we were able to link 63 nitrogen-fixing genomes (Dos Santos et al. 2012) to assemblies in RefSeq. We manually removed the endosymbiont UCYN-A; the other organisms are all believed to grow in minimal media.

From KOMODO, we identified a subset of media that did not contain amino acids or undefined components such as yeast extract or casamino acids. Although KOMODO reports an “IsComplex” field for media, this field is not sufficient because media could contain individual amino acids. Also, the DSMZ’s instructions for growing some organisms state that yeast extract should be added even if the base medium is defined. To filter out these cases, we searched through the PDF instructions associated with each medium. We also removed from consideration any organisms whose genomes were not in RefSeq as well as a few genomes that had been sequenced with Ion Torrent and appeared to have many frameshift errors. This left 90 genomes for microbes that grow in minimal media.

After removing a few overlaps between the nitrogen-fixing or KOMODO organisms or with the bacteria that have genetic data, we were left with genomes for 150 bacteria and archaea that can make all of the amino acids (supplementary table S3). To classify these microbes into phyla, families, and genera, we used GTDB release 89.0 (<https://data.ace.uq.edu.au/public/gtdb/data/releases/release89/89.0/>).

## Where should each pathway begin?

Most of GapMind’s pathways begin with central metabolic intermediates or with other amino acids. The central metabolites include the 13 central metabolites as defined in MetaCyc as well as isocitrate (as a precursor to glyoxylate and glycine). There are a few other precursors whose biosynthesis is complex and is not represented in GapMind: ATP (a precursor to histidine), methyltetrahydrofolate or methyl corrinoid proteins (which are precursors to methionine), and propionate (a precursor to isoleucine). Finally, homocysteine and phosphoserine are

intermediates in the biosynthesis of methionine and serine (respectively) but can also be precursors to cysteine (see dependencies between pathways below). GapMind does not represent central metabolism or the regeneration of cofactors such as ATP or NAD(P)H.

## Defining each step

Each step is defined by one or more EC (enzyme commission) numbers, terms, or UniProt identifiers. EC numbers can be matched to curated descriptions and to families in TIGRFam. EC numbers work well for most steps, but some steps do not have fully specified four-digit EC numbers or are catalyzed by heteromeric protein complexes. So, steps can also be defined by terms that appear in the curated protein descriptions. For instance, imidazole glycerol phosphate synthase (an enzyme in histidine biosynthesis) is a heterodimer and described as two steps, hisF and hisH. HisF is defined by the curated term “hisF” or by TIGRFam TIGR00735. GapMind’s matching of terms to curated descriptions is case-insensitive and each match must begin and end at word boundaries. For some steps, we also identified specific sequences (by UniProt identifier) that are known to perform the step, but are not curated in the databases that GapMind relies on. We identified 99 such sequences, mostly by using the fitness data, but also from the literature.

Because enzyme subunits may not be described consistently across the databases that GapMind relies on, the definition of a step can also “ignore” proteins that might or might not match the step. Hits to “ignored” proteins are disregarded when testing if a candidate is similar to proteins with other functions. “Ignore” can also be useful when closely-related proteins have different substrate specificities. For example, 3-isopropylmalate dehydratase (LeuCD) from *Desulfovibrio vulgaris* Hildenborough (DVU2982, DVU2983) is over 50% identical to a 2,3-methylmalate dehydratase (Q0QLE2, Q0QLE1), which would lead both LeuC and LeuD to be moderate-confidence candidates. Fitness data confirms that DVU2982:DVU2983 are required for amino acid biosynthesis (V. V. Trotter, personal communication). So we modified the step definitions for LeuC and LeuD to ignore Q0QLE2 and Q0QLE1. As another example, it can be difficult to distinguish O-acetylhomoserine sulfhydrylase and O-succinylhomoserine sulfhydrylase. (In fact, misannotation of these enzymes is widespread (Bastard et al. 2017).) Hits to proteins annotated with EC 2.5.1.49 (O-acetylhomoserine sulfhydrylase) are ignored when determining if a candidate for O-succinylhomoserine sulfhydrylase should be considered high-confidence. This example also illustrates that although GapMind tries to find a high-confidence path, it may not be confident as to the cofactors or even the exact substrates. Similarly, in the Results, we mentioned the difficulty of distinguishing prephenate dehydrogenase and arogenate dehydrogenase.

GapMind’s pathways include 183 total steps, but some of these steps are identical (or nearly so) across different pathways. Not considering these identical steps, there are 149 different steps represented in GapMind. After removing heteromers, multi-component enzymes, or carrier proteins, this reduces to 133 enzymes. If different versions of an enzyme have different subunit compositions, they are described separately, so these correspond to 130 different reactions.

## Finding candidates each step

Each step definition is converted to a list of characterized proteins, uncharacterized but curated proteins, and/or protein families. Then, GapMind uses ublast (Edgar 2010) to compare the predicted proteins in the genome to the characterized or curated proteins. It considers hits with at least 30% identity and with  $E < 0.01$ . GapMind uses HMMER 3 (Eddy 2011) to compare the predicted proteins to families and uses the trusted cutoff provided by the curator of each family.

## Scoring candidates for each step

GapMind then checks if these candidates are similar to proteins that have other functions. Specifically, it compares each candidate in the genome of interest (whether from ublast or HMMER) to the database of characterized proteins, again using ublast with at least 30% identity and  $E < 0.01$ . Any similarity between a candidate and a protein that match the step or is “ignored” for that step is disregarded. Also, to support the identification of fusion proteins, hits that do not overlap at least 50% of the relevant region of the candidate (that was identified by usearch or HMMER) are ignored. The remaining hit with the highest bit score (if any) is the “other” hit.

A candidate for a step is considered high-confidence if it is over 40% identical to a characterized protein and the alignment covers over 80% of that protein, and the bit score is at least 10 bits higher than for the “other” hit. Alternatively, a candidate is high-confidence if HMMER finds a hit (above the trusted cutoff), the alignment covers at least 80% of the HMM, and the other hit is under 40% identity or has under 75% coverage. A candidate for a step is medium-confidence if it is over 40% identical to either a characterized or curated protein with above 70% coverage (regardless of the “other” hit), or is above 30% identical to a characterized or curated protein with above 80% coverage and the bit score is higher than for the “other” hit, or if HMMER finds a hit (above the trusted cutoff). Other hits from ublast with at least 50% coverage are low-confidence.

## Split candidates

GapMind attempts to join low-coverage hits from ublast together if the alignments score noticeably higher than “other” hits (by at least 10 bits) and they are similar to the same characterized or curated protein. GapMind checks that there is little overlap between the alignments (at most 20% of either alignment) and that the combined alignment covers at least 70% of the characterized or curated protein. If the split candidate (the combination of the two alignments) has a higher confidence score (as defined above) than either of the components, then the split is chosen as the candidate instead.

In the GapMind website, split candidates are marked with an asterisk. If the two parts of the split are adjacent, it is often ambiguous whether the protein-coding gene is actually split, or disrupted by a genuine frameshift, or disrupted by a frameshift error in the genome sequence.



For the 35 organisms with genetic data, we identified 11 cases where the only high-confidence candidate for a step was a split protein. All of these were on the best path for that amino acid. Nine of these cases involved MetH and we believe that these are genuine splits because similar splits are found in related genomes. The other two cases may be spurious. In *Pseudomonas fluorescens* FW300-N1B4, phosphoribosylanthranilate isomerase (a step in tryptophan synthesis) appeared to be split into two adjacent proteins in the public assembly (GCF\_001625455.1), which is based on PacBio and Illumina data. However, in an alternate assembly based on the Illumina data only, there is a single-nucleotide insertion in this region (5 Cs instead of 4 Cs starting at position 4,993 of NZ\_LUKJ01000003.1). This change leads to a single reading frame, so the split is probably spurious. Finally, in *Paraburkholderia bryophila* 376MFSha3.1, threonine ammonia-lyase (IlvA) was identified as split into two proteins (H281DRAFT\_04606 and H281DRAFT\_01887). The first protein contains a pyridoxal-phosphate dependent enzyme domain (PF00291) and the second protein contains two copies of the C-terminal regulatory domain of threonine dehydratase (PF00585). Neither protein has strong auxotrophic phenotypes, which might indicate genetic redundancy with H281DRAFT\_04028, which is predicted to be a catabolic threonine dehydratase. One part of the split (H281DRAFT\_04606) is over 70% identical to the N-terminal half of HSERO\_RS19510 from *Herbaspirillum seropedicae* SmR1, which does have auxotrophic phenotypes. It is not clear if *P. bryophila* has a split IlvA or the catalytic domain alone (H281DRAFT\_04606) is sufficient for activity.

## Scoring pathways

The score for a step is the score of its best candidate (high, medium, or low). The score for a pathway is the lowest score of any of its steps (or sub-pathways). The best path for an amino acid is the one that gives the best score. If two paths have the same score, then GapMind considers a secondary score which gives weights of -2, -0.1, and +1 to low-, medium-, and high-confidence steps. If there is still a tie, then GapMind chooses the longer path.

## Dependencies between pathways

To indicate dependencies between pathways, GapMind includes “requirements” that link a pathway or sub-pathway to a step in the synthesis of another amino acid that must be present (or must not be present). If these requirements are violated, then GapMind issues a warning. We chose not to give amino acids as requirements (such as a serine requirement for cysteine biosynthesis) because GapMind already shows if an amino acid might be required for growth. However, we do use requirements to define dependencies on intermediates. For example, some organisms form cysteine from phosphoserine instead of from serine; if this pathway is on the best path, then GapMind will check if serA and serC are present. As another example, GapMind will issue a warning if the organism is predicted to synthesize methionine from cysteine (transsulfuration) and also cysteine from methionine (reverse transsulfuration). This hypothetical organism might require either methionine or cysteine for growth because it might not be able to assimilate sulfide.

## Similarity to microbes with known gaps

To quickly identify similarities between a genome of interest and the microbes that have known gaps, GapMind relies on ribosomal proteins as marker genes. Specifically, it uses the ribosomal subset of the marker genes used in GTDB (25 for bacteria and 32 for archaea). There are 93 microbes with known gaps (9 from the 35 bacteria with genetic data and 84 from the 150 diverse prokaryotes that grow in minimal media). For each of the 93 microbes with a “known gap,” we used HMMER (with the models specified by GTDB) to identify the ribosomal proteins. If a genome contains more than one protein matching an HMM, all are ignored.

Then, when analyzing a new genome, GapMind uses usearch with global alignment (Edgar 2010) to quickly find proteins in the new genome that are at least 50% identical to the marker genes and with alignment coverage of at least 70%. GapMind only searches for the top 20 hits (-maxaccepts 20 -maxrejects 20). Only one-to-one hits are retained. Genomes are considered to be related if there at least 10 retained hits and the median hit is at least 75% identical. We tested this definition of “related” by comparing the marker genes from the 93 microbes that have known gaps to each other. Of the 94 pairs of microbes from the same family (as classified in GTDB), 72 were “related.” Of the 4,184 pairs of microbes that do not belong to the same family, just 31 were “related.”

## Software

GapMind is written in Perl 5. The web-based interface relies on the common gateway interface library (CGI.pm). We used usearch 10.0 (the free 32-bit version) and HMMER 3.1b2. The web server runs usearch and HMMer with 6 threads.

## Availability of data and code

The code for GapMind is included in the PaperBLAST code repository (<https://github.com/morgannprice/PaperBLAST>). The definition of each pathway, with comments, is included in the code repository in the gaps/aa subdirectory. That subdirectory also includes tables of dependencies between pathways, curated gaps (in the 35 bacteria), and known gaps (in the 150 diverse microbes). The database of characterized proteins and the list of proteins associated with each step is available for download ([http://papers.genomics.lbl.gov/tmp/path\\_aa/aa.resources.tar.gz](http://papers.genomics.lbl.gov/tmp/path_aa/aa.resources.tar.gz)). The code, the database, and the results (for the 35 bacteria and the 150 diverse microbes) are also archived at figshare (<https://doi.org/10.6084/m9.figshare.9693689.v1>). The fitness data is available from the Fitness Browser (<http://fit.genomics.lbl.gov>).

## Appendix 1: Variant pathways and enzymes in GapMind

Besides pathways from MetaCyc, GapMind also describes:

- Proline synthesis via ornithine cyclodeaminase (Graupner and White 2001)

- Arginine synthesis via succinylated intermediates (see the Results)
- Cysteine synthesis via O-succinylserine (Bastard et al. 2017)

Also, GapMind includes tyrosine biosynthesis from phenylalanine (see the Results), even though MetaCyc describes it as occurring only in Metazoa.

GapMind also describes some variant enzymes that might not be expected from MetaCyc's pathway descriptions or from the other curated databases. These variants are from the literature (as opposed to being from our genetic data):

- The methionine synthase from methanogens, which probably uses corrinoid proteins as the methyl donor instead of tetrahydrofolate (Schröder and Thauer 1999).
- The three-part methionine synthase from *Phaeobacter inhibens* (Price, Zane, et al. 2018)
- The reactivation of vitamin B12 (the reduction of co(II)balamin to co(I)balamin) is described as a separate step that is required for the activity of vitamin B12-dependent methionine synthase. GapMind associates two families with the reactivation of vitamin B12: PF02965, which is part of MetH in *E. coli* and many other bacteria, and the RamA-like domain PF14574 (Ferguson et al. 2009; Price, Zane, et al. 2018).
- Although MetaCyc includes the reductive sulfuration of aspartate semialdehyde as part of the pathway "L-methionine biosynthesis IV", it links this activity to just one gene. Based on genetic evidence from both *Methanosarcina acetivorans* and *Desulfovibrio vulgaris*, we believe that two other genes are also required (Rauch et al. 2014; Rauch and Perona 2016; Price, Zane, et al. 2018).
- The histidinol-phosphate phosphatase HisJ from *Bacillus subtilis* (Ghodge et al. 2013). (This protein is annotated in Swiss-Prot, but does not have an experimental evidence code for its catalytic activity, so it was not included in PaperBLAST's database.)
- MetI from *Bacillus subtilis* is O-acetylhomoserine sulfhydrylase and cystathionine  $\gamma$ -synthase (Auger et al. 2002)
- 2-oxobutanoate:ferredoxin oxidoreductase provides an alternate route to 2-oxobutanoate (which is a precursor to isoleucine). MetaCyc describes this reaction but links it to one subunit instead of to both subunits (Fukuda and Wakagi 2002).

## Appendix 2: Potential pathways not included in GapMind

Recent work has suggested that some bacteria can synthesize glycine directly from carbon dioxide and ammonia by using the glycine cleavage system in reverse to convert CO<sub>2</sub>, ammonia, 5,10-methylenetetrahydrofolate, and NADH to glycine, tetrahydrofolate, and NAD<sup>+</sup> (Figueroa et al. 2018; Tveit et al. 2019). Serine hydroxymethyltransferase (in the reverse of the usual direction) could then form serine. In contrast, most organisms form serine from 3-phosphoglycerate (an intermediate in glycolysis) and use serine hydroxymethyltransferase to obtain glycine. The two bacteria proposed to use the glycine cleavage system in reverse are *Methylocapsa gorgona* MG08 (NCBI assembly GCF\_004564215.1) and *Phosphitovorax anaerolimi* Phox-21 (assembly GCA\_001896555.1). *M. gorgona* appears to encode the standard serine synthesis pathway, with a high-confidence candidate for all three steps. In *P. anaerolimi*, the presence of serine synthesis from 3-phosphoglycerate is unclear, but it does

have candidates for all three steps. Since it remains uncertain if the glycine cleavage system can be the sole source of glycine and serine, these pathways were not included in GapMind.

The MetaCyc entry for L-serine biosynthesis II, which occurs in plants, also suggests that "*Pseudomonas sp. AM1*", which is now known as *Methylobacterium extorquens* AM1, can synthesize serine from glycerate. However the cited paper (Heptinstall and Quayle 1970) actually shows that hydroxypyruvate reductase is required for growth on one-carbon substrates. We now know that this enzyme is part of the serine pathway for assimilating one-carbon units, rather than being dedicated to serine synthesis. So we decided not to include this pathway for serine synthesis (with glycerate as an intermediate) in GapMind.

The MetaCyc pathway L-isoleucine biosynthesis III begins with the glutamate mutase reaction. This pathway is not included in GapMind because glutamate mutase has not been linked to sequence and because no organism has been demonstrated to rely on this pathway to form oxobutanoate (a precursor to isoleucine).

### Appendix 3: Errors in genome sequences or gene models

Six of the gaps in the 35 bacteria with fitness data were due to errors in the genome sequence or to a protein that was not identified, even though an open reading frame is present.

We previously reported a frameshift error in the genome sequence of *Azospirillum brasilense* Sp245 (NCBI assembly GCF\_000237365.1) that led to a spurious gap for the histidinol dehydrogenase *hisD* in histidine biosynthesis (Price, Zane, et al. 2018). Here, we identified two missing gene calls in *A. brasilense*: the phosphoserine transaminase *serC* (over 50% identical to SERC\_METBF) and the shikimate kinase *aroL* (over 40% identical to AROK\_ECOLI).

In the assembly that we used for *Shewanella oneidensis* MR-1 (NCBI assembly GCF\_000146165.1), chorismate synthase *aroC* appears to be truncated or split into two reading frames (SO3078.2 and SO\_3079). GapMind classified this as a medium-confidence candidate. Inspection of sequencing data (from TnSeq (Wetmore et al. 2015)) showed that this frameshift is an error in the genome sequence. Also, a proteomics study reported that SO\_3079, which is the shorter and downstream part of the protein, is expressed (Romine et al. 2004). This frameshift was corrected in a more recent assembly of *S. oneidensis* (GCF\_000146165.2).

Finally, we identified two errors that led to spurious gaps in *Pseudomonas fluorescens* FW300-N1B4 (NCBI assembly GCF\_001625455.1). First, by comparing the published assembly to alternate assemblies, we identified a region that was missing; this region included an open reading frame with 84% identity to METZ\_PSEAE. Second, an open reading frame with 67% identity to KPRS\_ECOLI is present but no protein was predicted. We also identified a frameshift error in the sequence of phosphoribosylanthranilate isomerase that led to a spurious split gene (see Methods).

## Supplementary Information

Supplementary table S1: 35 bacteria with large-scale genetic data that grow in defined minimal media.

Supplementary table S2: Novel or diverged biosynthetic enzymes that we annotated using the genetic data.

Supplementary table S3: Genomes of 150 additional bacteria and archaea that grow in defined minimal media.

Supplementary table S4: Manual examination of 20 low-confidence steps from the nitrogen-fixing subset of the 150 bacteria and archaea.

[Supplementary tables in google sheets](#)

## Acknowledgements

We thank Valentine V. Trotter for pre-publication access to genetic data for *Desulfovibrio vulgaris* Hildenborough.

ENIGMA is a Scientific Focus Area Program supported by the U. S. Department of Energy, Office of Science, Office of Biological and Environmental Research, Genomics:GTL Foundational Science through contract DE-AC02-05CH11231 between Lawrence Berkeley National Laboratory and the U. S. Department of Energy.

Bibliography

## References

Auger, S., Yuen, W.H., Danchin, A. and Martin-Verstraete, I. 2002. The metIC operon involved in methionine biosynthesis in *Bacillus subtilis* is controlled by transcription antitermination. *Microbiology* 148(Pt 2), pp. 507–518.

Bastard, K., Perret, A., Mariage, A., et al. 2017. Parallel evolution of non-homologous isofunctional enzymes in methionine biosynthesis. *Nature Chemical Biology* 13(8), pp. 858–866.

Blöchl, E., Rachel, R., Burggraf, S., Hafenbradl, D., Jannasch, H.W. and Stetter, K.O. 1997. *Pyrolobus fumarii*, gen. and sp. nov., represents a novel group of archaea, extending the upper temperature limit for life to 113 degrees C. *Extremophiles: Life Under Extreme Conditions* 1(1), pp. 14–21.

Carini, P., Steindler, L., Beszteri, S. and Giovannoni, S.J. 2013. Nutrient requirements for growth of the extreme oligotroph “Candidatus Pelagibacter ubique” HTCC1062 on a defined

medium. *The ISME Journal* 7(3), pp. 592–602.

Caspi, R., Altman, T., Dale, J.M., et al. 2010. The MetaCyc database of metabolic pathways and enzymes and the BioCyc collection of pathway/genome databases. *Nucleic Acids Research* 38(Database issue), pp. D473-9.

Chen, I.-M.A., Markowitz, V.M., Chu, K., et al. 2013. Improving microbial genome annotations in an integrated database context. *Plos One* 8(2), p. e54859.

Christensen, J.E. and Steele, J.L. 2003. Impaired growth rates in milk of *Lactobacillus helveticus* peptidase mutants can be overcome by use of amino acid supplements. *Journal of Bacteriology* 185(11), pp. 3297–3306.

Christiansen, J.K., Hughes, J.E., Welker, D.L., Rodríguez, B.T., Steele, J.L. and Broadbent, J.R. 2008. Phenotypic and genotypic analysis of amino acid auxotrophy in *Lactobacillus helveticus* CNRZ 32. *Applied and Environmental Microbiology* 74(2), pp. 416–423.

de Crécy-Lagard, V. 2014. Variations in metabolic pathways create challenges for automated metabolic reconstructions: Examples from the tetrahydrofolate synthesis pathway. *Computational and structural biotechnology journal* 10(16), pp. 41–50.

Dehal, P.S., Joachimiak, M.P., Price, M.N., et al. 2010. MicrobesOnline: an integrated portal for comparative and functional genomics. *Nucleic Acids Research* 38(Database issue), pp. D396-400.

Devendran, S., Shrestha, R., Alves, J.M.P., et al. 2019. *Clostridium scindens* ATCC 35704: Integration of Nutritional Requirements, the Complete Genome Sequence, and Global Transcriptional Responses to Bile Acids. *Applied and Environmental Microbiology* 85(7).

Dos Santos, P.C., Fang, Z., Mason, S.W., Setubal, J.C. and Dixon, R. 2012. Distribution of nitrogen fixation and nitrogenase-like sequences amongst microbial genomes. *BMC Genomics* 13, p. 162.

D'Souza, G., Waschina, S., Pande, S., Bohl, K., Kaleta, C. and Kost, C. 2014. Less is more: selective advantages can explain the prevalent loss of biosynthetic genes in bacteria. *Evolution* 68(9), pp. 2559–2570.

Eddy, S.R. 2011. Accelerated profile HMM searches. *PLoS Computational Biology* 7(10), p. e1002195.

Edgar, R.C. 2010. Search and clustering orders of magnitude faster than BLAST. *Bioinformatics* 26(19), pp. 2460–2461.

Ferguson, T., Soares, J.A., Lienard, T., Gottschalk, G. and Krzycki, J.A. 2009. RamA, a protein required for reductive activation of corrinoid-dependent methylamine methyltransferase reactions in methanogenic archaea. *The Journal of Biological Chemistry* 284(4), pp. 2285–2295.

Figueroa, I.A., Barnum, T.P., Somasekhar, P.Y., Carlström, C.I., Engelbrektson, A.L. and Coates, J.D. 2018. Metagenomics-guided analysis of microbial chemolithoautotrophic phosphite oxidation yields evidence of a seventh natural CO<sub>2</sub> fixation pathway. *Proceedings of the*

*National Academy of Sciences of the United States of America* 115(1), pp. E92–E101.

Finn, R.D., Bateman, A., Clements, J., et al. 2014. Pfam: the protein families database. *Nucleic Acids Research* 42(Database issue), pp. D222–30.

Flydal, M.I., Chatfield, C.H., Zheng, H., et al. 2012. Phenylalanine hydroxylase from *Legionella pneumophila* is a thermostable enzyme with a major functional role in pyomelanin synthesis. *Plos One* 7(9), p. e46209.

Fukuda, E. and Wakagi, T. 2002. Substrate recognition by 2-oxoacid:ferredoxin oxidoreductase from *Sulfolobus* sp. strain 7. *Biochimica et Biophysica Acta* 1597(1), pp. 74–80.

Ghodge, S.V., Fedorov, A.A., Fedorov, E.V., et al. 2013. Structural and mechanistic characterization of L-histidinol phosphate phosphatase from the polymerase and histidinol phosphatase family of proteins. *Biochemistry* 52(6), pp. 1101–1112.

Graupner, M. and White, R.H. 2001. *Methanococcus jannaschii* generates L-proline by cyclization of L-ornithine. *Journal of Bacteriology* 183(17), pp. 5203–5205.

Haft, D.H., Selengut, J.D., Richter, R.A., Harkins, D., Basu, M.K. and Beck, E. 2013. Tigrfams and genome properties in 2013. *Nucleic Acids Research* 41(Database issue), pp. D387–95.

Heptinstall, J. and Quayle, J.R. 1970. Pathways leading to and from serine during growth of *Pseudomonas* AM1 on C1 compounds or succinate. *The Biochemical Journal* 117(3), pp. 563–572.

Keseler, I.M., Collado-Vides, J., Gama-Castro, S., et al. 2005. EcoCyc: a comprehensive database resource for *Escherichia coli*. *Nucleic Acids Research* 33(Database issue), pp. D334–7.

Kublanov, I.V., Sigalova, O.M., Gavrillov, S.N., et al. 2017. Genomic Analysis of *Caldithrix abyssi*, the Thermophilic Anaerobic Bacterium of the Novel Bacterial Phylum Calditrichaeota. *Frontiers in microbiology* 8, p. 195.

Liu, H., Price, M.N., Carlson, H.K., et al. 2019. Large-scale chemical-genetics of the human gut bacterium *Bacteroides thetaiotaomicron*. *BioRxiv*.

Lombard, V., Golaconda Ramulu, H., Drula, E., Coutinho, P.M. and Henrissat, B. 2014. The carbohydrate-active enzymes database (CAZy) in 2013. *Nucleic Acids Research* 42(Database issue), pp. D490–5.

Luque, J.M.C. 2010. Discovery of novel pathways of microbial arginine biosynthesis. Undergraduate thesis. Children's National Medical Center.

Madupu, R., Richter, A., Dodson, R.J., et al. 2012. CharProtDB: a database of experimentally characterized protein annotations. *Nucleic Acids Research* 40(Database issue), pp. D237–41.

Marchler-Bauer, A., Derbyshire, M.K., Gonzales, N.R., et al. 2015. CDD: NCBI's conserved domain database. *Nucleic Acids Research* 43(Database issue), pp. D222–6.

Monticello, D.J., Hadioetomo, R.S. and Costilow, R.N. 1984. Isoleucine synthesis by *Clostridium sporogenes* from propionate or alpha-methylbutyrate. *Journal of general microbiology* 130(2),

pp. 309–318.

Morgat, A., Axelsen, K.B., Lombardot, T., et al. 2015. Updates in Rhea--a manually curated resource of biochemical reactions. *Nucleic Acids Research* 43(Database issue), pp. D459-64.

Oberhardt, M.A., Zarecki, R., Gronow, S., et al. 2015. Harnessing the landscape of microbial culture media to predict new organism-media pairings. *Nature Communications* 6, p. 8493.

Parks, D.H., Chuvochina, M., Waite, D.W., et al. 2018. A standardized bacterial taxonomy based on genome phylogeny substantially revises the tree of life. *Nature Biotechnology* 36(10), pp. 996–1004.

Placzek, S., Schomburg, I., Chang, A., et al. 2017. BRENDA in 2017: new perspectives and new tools in BRENDA. *Nucleic Acids Research* 45(D1), pp. D380–D388.

Price, M.N. and Arkin, A.P. 2019. Curated BLAST for genomes. *mSystems* 4(2).

Price, M.N. and Arkin, A.P. 2017. PaperBLAST: Text Mining Papers for Information about Homologs. *mSystems* 2(4).

Price, M.N., Ray, J., Iavarone, A.T., et al. 2019. Oxidative pathways of deoxyribose and deoxyribonate catabolism. *mSystems* 4(1).

Price, M.N., Wetmore, K.M., Waters, R.J., et al. 2016. Deep Annotation of Protein Function across Diverse Bacteria from Mutant Phenotypes. *bioRxiv*.

Price, M.N., Wetmore, K.M., Waters, R.J., et al. 2018. Mutant phenotypes for thousands of bacterial genes of unknown function. *Nature* 557(7706), pp. 503–509.

Price, M.N., Zane, G.M., Kuehl, J.V., et al. 2018. Filling gaps in bacterial amino acid biosynthesis pathways with high-throughput genetics. *PLoS Genetics* 14(1), p. e1007147.

Rand, J.M., Pisithkul, T., Clark, R.L., et al. 2017. A metabolic pathway for catabolizing levulinic acid in bacteria. *Nature microbiology* 2(12), pp. 1624–1634.

Rauch, B.J., Gustafson, A. and Perona, J.J. 2014. Novel proteins for homocysteine biosynthesis in anaerobic microorganisms. *Molecular Microbiology* 94(6), pp. 1330–1342.

Rauch, B.J. and Perona, J.J. 2016. Efficient Sulfide Assimilation in *Methanosarcina acetivorans* Is Mediated by the MA1715 Protein. *Journal of Bacteriology* 198(14), pp. 1974–1983.

Roberts, R.J., Vincze, T., Posfai, J. and Macelis, D. 2015. REBASE--a database for DNA restriction and modification: enzymes, genes and genomes. *Nucleic Acids Research* 43(Database issue), pp. D298-9.

Romine, M.F., Elias, D.A., Monroe, M.E., et al. 2004. Validation of *Shewanella oneidensis* MR-1 small proteins by AMT tag-based proteome analysis. *Omics : a journal of integrative biology* 8(3), pp. 239–254.

Rubin, B.E., Wetmore, K.M., Price, M.N., et al. 2015. The essential gene set of a photosynthetic organism. *Proceedings of the National Academy of Sciences of the United States of America* 112(48), pp. E6634-43.



Schnoes, A.M., Brown, S.D., Dodevski, I. and Babbitt, P.C. 2009. Annotation error in public databases: misannotation of molecular function in enzyme superfamilies. *PLoS Computational Biology* 5(12), p. e1000605.

Schröder, I. and Thauer, R.K. 1999. Methylcobalamin:homocysteine methyltransferase from *Methanobacterium thermoautotrophicum*. Identification as the metE gene product. *European Journal of Biochemistry / FEBS* 263(3), pp. 789–796.

Shi, D., Morizono, H., Cabrera-Luque, J., et al. 2006. Structure and catalytic mechanism of a novel N-succinyl-L-ornithine transcarbamylase in arginine biosynthesis of *Bacteroides fragilis*. *The Journal of Biological Chemistry* 281(29), pp. 20623–20631.

Shi, D., Yu, X., Cabrera-Luque, J., et al. 2007. A single mutation in the active site swaps the substrate specificity of N-acetyl-L-ornithine transcarbamylase and N-succinyl-L-ornithine transcarbamylase. *Protein Science* 16(8), pp. 1689–1699.

Tang, Y., Pingitore, F., Mukhopadhyay, A., Phan, R., Hazen, T.C. and Keasling, J.D. 2007. Pathway confirmation and flux analysis of central metabolic pathways in *Desulfovibrio vulgaris hildenborough* using gas chromatography-mass spectrometry and Fourier transform-ion cyclotron resonance mass spectrometry. *Journal of Bacteriology* 189(3), pp. 940–949.

The UniProt Consortium 2017. UniProt: the universal protein knowledgebase. *Nucleic Acids Research* 45(D1), pp. D158–D169.

Tian, W. and Skolnick, J. 2003. How well is enzyme function conserved as a function of pairwise sequence identity? *Journal of Molecular Biology* 333(4), pp. 863–882.

Tveit, A.T., Hestnes, A.G., Robinson, S.L., et al. 2019. Widespread soil bacterium that oxidizes atmospheric methane. *Proceedings of the National Academy of Sciences of the United States of America* 116(17), pp. 8515–8524.

Usha, V., Lloyd, A.J., Roper, D.I., et al. 2016. Reconstruction of diaminopimelic acid biosynthesis allows characterisation of *Mycobacterium tuberculosis* N-succinyl-L,L-diaminopimelic acid desuccinylase. *Scientific reports* 6, p. 23191.

Varel, V.H. and Bryant, M.P. 1974. Nutritional features of *Bacteroides fragilis* subsp. *fragilis*. *Applied microbiology* 28(2), pp. 251–257.

Veith, N., Solheim, M., van Grinsven, K.W.A., et al. 2015. Using a genome-scale metabolic model of *Enterococcus faecalis* V583 to assess amino acid uptake and its impact on central metabolism. *Applied and Environmental Microbiology* 81(5), pp. 1622–1633.

Wetmore, K.M., Price, M.N., Waters, R.J., et al. 2015. Rapid quantification of mutant fitness in diverse bacteria by sequencing randomly bar-coded transposons. *mBio* 6(3), pp. e00306-15.
